Published by Portland Press Limited six times a year  
(February, April, June, August, October and December).  
The Biochemist © 2022 Biochemical Society  
ISSN 1740-1194 (Online)

First Floor  
10 Queen Street Place  
London EC4R 1BE  
email: [editorial@portlandpress.com](mailto:editorial@portlandpress.com)  
website: <https://portlandpress.com/biochemist>  
Registered charity no. 253894

**Science Editor:** Heather Doran (University of Dundee, UK)

**Editorial Board:** David Pye, Shane Hegarty,  
Matthew Lloyd, Harriet Groom, Roseanna Hare  
and Doug Marshall.

**Production Editor:** Nicholas Walker

**Editorial team:** Orla Lappin

**Design by** Peter Jones

*The Editors are pleased to consider items submitted for publication. Opinions expressed in signed articles are not necessarily those of the Society. The information in this issue was correct at the time of publication.*

## Enterprising biochemistry

by Heather Doran, University of Dundee

This issue of *The Biochemist* looks a little different and I hope it brings some alternative perspectives too. It covers stories and insights from a number of individuals who have experience in bio-enterprise, bringing business and biochemistry together. Their ideas, pathways and stories might inspire you to take up a career path in bio-business, work with industry or begin your own enterprise.

When I was studying for my undergraduate degree, I elected to take a bio-business module and within my PhD I opted to participate in business-related training (Biotechnology Yes). I found both of these experiences extremely valuable in building my skill set and although I still sit within academia I have certainly applied some of the principles within my work. Biology often sits closely with business; without that relationship there isn't the opportunity to upscale or grow and if research is focused on an intervention with a global reach it often needs the backing of business to achieve its goals (just look at the COVID vaccine). Until now I haven't taken a step to build a business but in taking these courses they planted a seed that now allows me to see the potential of taking knowledge and applying it in different ways.

I am based in Dundee, Scotland, which has a vibrant life science cluster with businesses, universities and research institutes located together. Bioenterprise is part of an ecosystem that involves universities, research and business; there's an expectation that the bioeconomy is going to continue to grow, creating new jobs and solutions to local and global challenges across a wide range of sectors. Many undergraduate degrees in biology and most universities offer support for entrepreneurship and encourage students to take a step to create their own business.

I hope the tips and stories shared in this issue are useful and if you create a successful enterprise from what you read in this issue, don't forget to come back and let us know about it!

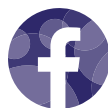

Find us on Facebook at [Biochemical Society](#)

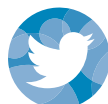

Follow us on Twitter [@The\\_Biochemist](#)
